# Supplementary material
Source: Springer Nature journal article supplement (https://www.springermedizin.de/resource/supplementary/12936_2012_2592_MOESM3_ESM.pdf/9544838)
Supplement: MOESM3 [file 9544838]

# Entomological inoculation rate

Number of episodes averted per 1,000 pop. per year

2

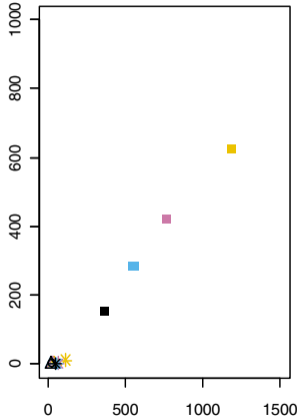

20

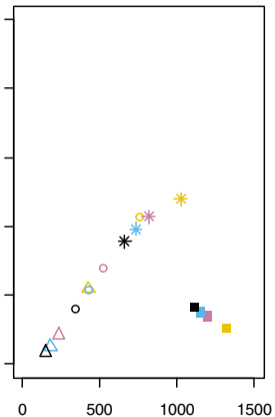

50

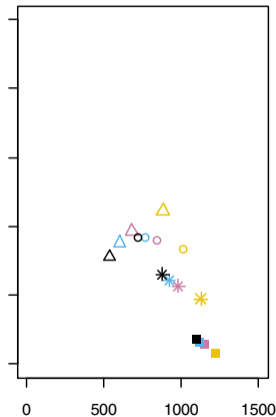

Number of episodes per 1,000 pop. per year in the comparator scenario
